# Supplementary material
Source: publisher figshare collection journal article supplement (https://sage.figshare.com/ndownloader/files/39664633)
Supplement: Supplementary file 1 [file 39664633]

Archive with 157 entries (157 files):
- 00000000001_lightNotesData.bin
- 00000000003_lightTableData.bin
- 00000000004_lightTableData.bin
- outputViewer0000000000_heading.xml
- 00000000011_lightNotesData.bin
- 00000000012_lightTableData.bin
- outputViewer0000000001_heading.xml
- 00000000021_lightNotesData.bin
- 00000000022_lightTableData.bin
- 00000000023_lightTableData.bin
- outputViewer0000000002_heading.xml
- 00000000031_lightNotesData.bin
- 00000000032_lightTableData.bin
- 00000000033_lightTableData.bin
- outputViewer0000000003_heading.xml
- 00000000041_lightNotesData.bin
- 00000000042_lightTableData.bin
- 00000000043_lightTableData.bin
- outputViewer0000000004_heading.xml
- 00000000051_lightNotesData.bin
- 00000000052_lightTableData.bin
- outputViewer0000000005_heading.xml
- 00000000061_lightNotesData.bin
- 00000000062_lightTableData.bin
- outputViewer0000000006_heading.xml
- 00000000071_lightNotesData.bin
- 00000000072_lightTableData.bin
- 00000000073_lightTableData.bin
- 00000000074_lightTableData.bin
- 00000000075_lightTableData.bin
- 00000000076_lightTableData.bin
- 00000000077_lightTableData.bin
- 00000000078_lightTableData.bin
- 00000000079_lightTableData.bin
- 0000000007101_lightTableData.bin
- 00000000071021_lightTableData.bin
- 00000000071022_lightTableData.bin
- 00000000071023_lightTableData.bin
- 00000000071031_lightTableData.bin
- 00000000071032_lightTableData.bin
- 00000000071033_lightTableData.bin
- 00000000071041_lightTableData.bin
- 00000000071042_lightTableData.bin
- 00000000071043_lightTableData.bin
- 00000000071051_lightTableData.bin
- 00000000071052_lightTableData.bin
- 00000000071053_lightTableData.bin
- 00000000071111_lightTableData.bin
- 000000000711121_lightTableData.bin
- outputViewer0000000007_heading.xml
- 00000000081_lightNotesData.bin
- 00000000082_lightTableData.bin
- 00000000083_lightTableData.bin
- 00000000084_lightTableData.bin
- 00000000085_lightTableData.bin
- 00000000086_lightTableData.bin
- 00000000087_lightTableData.bin
- 00000000088_lightTableData.bin
- 00000000089_lightTableData.bin
- 0000000008101_lightTableData.bin
- 00000000081021_lightTableData.bin
- 00000000081022_lightTableData.bin
- 00000000081023_lightTableData.bin
- 00000000081031_lightTableData.bin
- 00000000081032_lightTableData.bin
- 00000000081033_lightTableData.bin
- 00000000081041_lightTableData.bin
- 00000000081042_lightTableData.bin
- 00000000081043_lightTableData.bin
- 00000000081051_lightTableData.bin
- 00000000081052_lightTableData.bin
- 00000000081053_lightTableData.bin
- 00000000081111_lightTableData.bin
- 000000000811121_lightTableData.bin
- outputViewer0000000008_heading.xml
- 00000000091_lightNotesData.bin
- 00000000092_lightTableData.bin
- 00000000093_lightTableData.bin
- 00000000094_lightTableData.bin
- 00000000095_lightTableData.bin
- 00000000096_lightTableData.bin
- 00000000097_lightTableData.bin
- 00000000098_lightTableData.bin
- 00000000099_lightTableData.bin
- 0000000009101_lightTableData.bin
- 00000000091021_lightTableData.bin
- 00000000091022_lightTableData.bin
- 00000000091023_lightTableData.bin
- 00000000091031_lightTableData.bin
- 00000000091032_lightTableData.bin
- 00000000091033_lightTableData.bin
- 00000000091041_lightTableData.bin
- 00000000091042_lightTableData.bin
- 00000000091043_lightTableData.bin
- 00000000091051_lightTableData.bin
- 00000000091052_lightTableData.bin
- 00000000091053_lightTableData.bin
- 00000000091111_lightTableData.bin
- 000000000911121_lightTableData.bin
- outputViewer0000000009_heading.xml
- 00000000101_lightNotesData.bin
- 00000000102_lightTableData.bin
- 00000000103_lightTableData.bin
- 0000000010411_lightTableData.bin
- 00000000104121_lightTableData.bin
- outputViewer0000000010_heading.xml
- 00000000111_lightNotesData.bin
- 00000000112_lightTableData.bin
- 00000000113_lightTableData.bin
- 00000000114_lightTableData.bin
- 00000000115_lightTableData.bin
- 00000000116_lightTableData.bin
- 00000000117_lightTableData.bin
- 00000000118_lightTableData.bin
- 00000000119_lightTableData.bin
- 0000000011101_lightTableData.bin
- 00000000111021_lightTableData.bin
- 00000000111022_lightTableData.bin
- 00000000111023_lightTableData.bin
- 00000000111031_lightTableData.bin
- 00000000111032_lightTableData.bin
- 00000000111033_lightTableData.bin
- 00000000111041_lightTableData.bin
- 00000000111042_lightTableData.bin
- 00000000111043_lightTableData.bin
- 00000000111051_lightTableData.bin
- 00000000111052_lightTableData.bin
- 00000000111053_lightTableData.bin
- 00000000111111_lightTableData.bin
- 000000001111121_lightTableData.bin
- outputViewer0000000011_heading.xml
- 00000000121_lightNotesData.bin
- 00000000122_lightTableData.bin
- 00000000123_lightTableData.bin
- 00000000124_lightTableData.bin
- 00000000125_lightTableData.bin
- 00000000126_lightTableData.bin
- 00000000127_lightTableData.bin
- 00000000128_lightTableData.bin
- 00000000129_lightTableData.bin
- 0000000012101_lightTableData.bin
- 00000000121021_lightTableData.bin
- 00000000121022_lightTableData.bin
- 00000000121023_lightTableData.bin
- 00000000121031_lightTableData.bin
- 00000000121032_lightTableData.bin
- 00000000121033_lightTableData.bin
- 00000000121041_lightTableData.bin
- 00000000121042_lightTableData.bin
- 00000000121043_lightTableData.bin
- 00000000121051_lightTableData.bin
- 00000000121052_lightTableData.bin
- 00000000121053_lightTableData.bin
- 00000000121111_lightTableData.bin
- 000000001211121_lightTableData.bin
- outputViewer0000000012_heading.xml
- META-INF/MANIFEST.MF
