# Supplementary material
Source: publisher figshare collection journal article supplement (https://sage.figshare.com/ndownloader/files/39664633)
Supplement: Supplementary file 1 [file 39664633 › outputViewer0000000003_heading.xml]

<?xml version="1.0" encoding="UTF-8" standalone="no"?><heading xmlns="http://xml.spss.com/spss/viewer/viewer-tree" xmlns:vgr="http://xml.spss.com/spss/viewer/viewer-graph" xmlns:vizml="http://xml.spss.com/visualization" xmlns:vmd="http://xml.spss.com/spss/viewer/viewer-model" xmlns:vps="http://xml.spss.com/spss/viewer/viewer-pagesetup" xmlns:vst="http://xml.spss.com/spss/viewer/viewer-style" xmlns:vtb="http://xml.spss.com/spss/viewer/viewer-table" xmlns:vtl="http://xml.spss.com/spss/viewer/table-looks" xmlns:vtt="http://xml.spss.com/spss/viewer/viewer-treemodel" xmlns:vtx="http://xml.spss.com/spss/viewer/viewer-text" xmlns:xsi="http://www.w3.org/2001/XMLSchema-instance" creation-date-time="Wednesday, October 19, 2022 10:33:40 AM CST" creator="C:\PROGRA~1\IBM\SPSSST~1" creator-version="28000000" xsi:schemaLocation="http://xml.spss.com/spss/viewer/viewer-tree http://xml.spss.com/spss/viewer/viewer-tree-1.2.xsd"><label>Output</label><heading commandName="Frequencies" creator-version="28000000" locale="en-US" olang="en"><label>Frequencies</label><container text-align="left" visibility="visible" width="1651px"><label>Title</label><vtx:text commandName="Frequencies" creator-version="28000000" type="title"><html xmlns="http://www.w3.org/1999/xhtml" lang="en"><![CDATA[<head><style type="text/css">p{color:0;font-family:SansSerif;font-size:14pt;font-style:normal;font-weight:bold;text-decoration:none}</style></head><BR>Frequencies]]></html></vtx:text></container><container text-align="left" visibility="hidden"><label>Notes</label><vtb:table commandName="Frequencies" creator-version="28000000" subType="Notes" tableId="-3886686550862331903" type="note"><vtb:tableStructure><vtb:dataPath>00000000031_lightNotesData.bin</vtb:dataPath></vtb:tableStructure></vtb:table></container><container text-align="left" visibility="visible"><label>Statistics</label><vtb:table commandName="Frequencies" creator-version="28000000" subType="Statistics" tableId="-3886686550862331901" type="table"><vtb:tableStructure><vtb:dataPath>00000000032_lightTableData.bin</vtb:dataPath></vtb:tableStructure></vtb:table></container><container text-align="left" visibility="visible"><label>Ethnic origin</label><vtb:table commandName="Frequencies" creator-version="28000000" subType="Frequencies" tableId="-3886686550862331900" type="table"><vtb:tableStructure><vtb:dataPath>00000000033_lightTableData.bin</vtb:dataPath></vtb:tableStructure></vtb:table></container></heading></heading>
