# Supplementary material
Source: publisher figshare collection journal article supplement (https://sage.figshare.com/ndownloader/files/39664633)
Supplement: Supplementary file 1 [file 39664633 › outputViewer0000000008_heading.xml]

<?xml version="1.0" encoding="UTF-8" standalone="no"?><heading xmlns="http://xml.spss.com/spss/viewer/viewer-tree" xmlns:vgr="http://xml.spss.com/spss/viewer/viewer-graph" xmlns:vizml="http://xml.spss.com/visualization" xmlns:vmd="http://xml.spss.com/spss/viewer/viewer-model" xmlns:vps="http://xml.spss.com/spss/viewer/viewer-pagesetup" xmlns:vst="http://xml.spss.com/spss/viewer/viewer-style" xmlns:vtb="http://xml.spss.com/spss/viewer/viewer-table" xmlns:vtl="http://xml.spss.com/spss/viewer/table-looks" xmlns:vtt="http://xml.spss.com/spss/viewer/viewer-treemodel" xmlns:vtx="http://xml.spss.com/spss/viewer/viewer-text" xmlns:xsi="http://www.w3.org/2001/XMLSchema-instance" creation-date-time="Wednesday, October 19, 2022 10:33:40 AM CST" creator="C:\PROGRA~1\IBM\SPSSST~1" creator-version="28000000" xsi:schemaLocation="http://xml.spss.com/spss/viewer/viewer-tree http://xml.spss.com/spss/viewer/viewer-tree-1.2.xsd"><label>Output</label><heading commandName="GLM" creator-version="28000000" locale="en-US" olang="en"><label>General Linear Model</label><container text-align="left" visibility="visible" width="1651px"><label>Title</label><vtx:text commandName="GLM" creator-version="28000000" type="title"><html xmlns="http://www.w3.org/1999/xhtml" lang="en"><![CDATA[<head><style type="text/css">p{color:0;font-family:SansSerif;font-size:14pt;font-style:normal;font-weight:bold;text-decoration:none}</style></head><BR>General&nbsp;Linear&nbsp;Model]]></html></vtx:text></container><container text-align="left" visibility="hidden"><label>Notes</label><vtb:table commandName="GLM" creator-version="28000000" subType="Notes" tableId="-3886686550857089023" type="note"><vtb:tableStructure><vtb:dataPath>00000000081_lightNotesData.bin</vtb:dataPath></vtb:tableStructure></vtb:table></container><container text-align="left" visibility="visible"><label>Within-Subjects Factors</label><vtb:table commandName="GLM" creator-version="28000000" subType="Within Subjects Factors" tableId="-3886686550857089021" type="table"><vtb:tableStructure><vtb:dataPath>00000000082_lightTableData.bin</vtb:dataPath></vtb:tableStructure></vtb:table></container><container text-align="left" visibility="visible"><label>Between-Subjects Factors</label><vtb:table commandName="GLM" creator-version="28000000" subType="Between Subjects Factors" tableId="-3886686550857089020" type="table"><vtb:tableStructure><vtb:dataPath>00000000083_lightTableData.bin</vtb:dataPath></vtb:tableStructure></vtb:table></container><container text-align="left" visibility="visible"><label>Descriptive Statistics</label><vtb:table commandName="GLM" creator-version="28000000" subType="Descriptive Statistics" tableId="-3886686550857089019" type="table"><vtb:tableStructure><vtb:dataPath>00000000084_lightTableData.bin</vtb:dataPath></vtb:tableStructure></vtb:table></container><container text-align="left" visibility="visible"><label>Multivariate Tests</label><vtb:table commandName="GLM" creator-version="28000000" subType="Default Multivariate Tests" tableId="-3886686550857089018" type="table"><vtb:tableStructure><vtb:dataPath>00000000085_lightTableData.bin</vtb:dataPath></vtb:tableStructure></vtb:table></container><container text-align="left" visibility="visible"><label>Mauchly's Test of Sphericity</label><vtb:table commandName="GLM" creator-version="28000000" subType="Mauchly Test" tableId="-3886686550857089017" type="table"><vtb:tableStructure><vtb:dataPath>00000000086_lightTableData.bin</vtb:dataPath></vtb:tableStructure></vtb:table></container><container text-align="left" visibility="visible"><label>Tests of Within-Subjects Effects</label><vtb:table commandName="GLM" creator-version="28000000" subType="Tests of Within Subjects Effects" tableId="-3886686550857089016" type="table"><vtb:tableStructure><vtb:dataPath>00000000087_lightTableData.bin</vtb:dataPath></vtb:tableStructure></vtb:table></container><container text-align="left" visibility="visible"><label>Tests of Within-Subjects Contrasts</label><vtb:table commandName="GLM" creator-version="28000000" subType="Tests of Within Subjects Contrasts" tableId="-3886686550857089015" type="table"><vtb:tableStructure><vtb:dataPath>00000000088_lightTableData.bin</vtb:dataPath></vtb:tableStructure></vtb:table></container><container text-align="left" visibility="visible"><label>Tests of Between-Subjects Effects</label><vtb:table commandName="GLM" creator-version="28000000" subType="Test of Between Subjects Fixed Effects" tableId="-3886686550857089014" type="table"><vtb:tableStructure><vtb:dataPath>00000000089_lightTableData.bin</vtb:dataPath></vtb:tableStructure></vtb:table></container><heading commandName="GLM" locale="en-US" olang="en"><label>Estimated Marginal Means</label><container text-align="left" visibility="visible" width="1651px"><label>Title</label><vtx:text commandName="GLM" creator-version="28000000" type="title"><html xmlns="http://www.w3.org/1999/xhtml" lang="en"><![CDATA[<head><style type="text/css">p{color:0;font-family:SansSerif;font-size:14pt;font-style:normal;font-weight:bold;text-decoration:none}</style></head><BR>Estimated&nbsp;Marginal&nbsp;Means]]></html></vtx:text></container><container text-align="left" visibility="visible"><label>1. Grand Mean</label><vtb:table commandName="GLM" creator-version="28000000" subType="Estimated Marginal Means" tableId="-3886686550857089013" type="table"><vtb:tableStructure><vtb:dataPath>0000000008101_lightTableData.bin</vtb:dataPath></vtb:tableStructure></vtb:table></container><heading commandName="GLM" locale="en-US" olang="en"><label>2. Condition - Group Assignment</label><container text-align="left" visibility="visible" width="1651px"><label>Title</label><vtx:text commandName="GLM" creator-version="28000000" type="title"><html xmlns="http://www.w3.org/1999/xhtml" lang="en"><![CDATA[<head><style type="text/css">p{color:0;font-family:SansSerif;font-size:14pt;font-style:normal;font-weight:bold;text-decoration:none}</style></head><BR>2.&nbsp;Condition&nbsp;-&nbsp;Group&nbsp;Assignment]]></html></vtx:text></container><container text-align="left" visibility="visible"><label>Estimates</label><vtb:table commandName="GLM" creator-version="28000000" subType="Estimated Marginal Means" tableId="-3886686550857089012" type="table"><vtb:tableStructure><vtb:dataPath>00000000081021_lightTableData.bin</vtb:dataPath></vtb:tableStructure></vtb:table></container><container text-align="left" visibility="visible"><label>Pairwise Comparisons</label><vtb:table commandName="GLM" creator-version="28000000" subType="EMMEANS Pairwise Comparisons" tableId="-3886686550857089011" type="table"><vtb:tableStructure><vtb:dataPath>00000000081022_lightTableData.bin</vtb:dataPath></vtb:tableStructure></vtb:table></container><container text-align="left" visibility="visible"><label>Univariate Tests</label><vtb:table commandName="GLM" creator-version="28000000" subType="EMMEANS Univariate Tests" tableId="-3886686550857089010" type="table"><vtb:tableStructure><vtb:dataPath>00000000081023_lightTableData.bin</vtb:dataPath></vtb:tableStructure></vtb:table></container></heading><heading commandName="GLM" locale="en-US" olang="en"><label>3. Time</label><container text-align="left" visibility="visible" width="1651px"><label>Title</label><vtx:text commandName="GLM" creator-version="28000000" type="title"><html xmlns="http://www.w3.org/1999/xhtml" lang="en"><![CDATA[<head><style type="text/css">p{color:0;font-family:SansSerif;font-size:14pt;font-style:normal;font-weight:bold;text-decoration:none}</style></head><BR>3.&nbsp;Time]]></html></vtx:text></container><container text-align="left" visibility="visible"><label>Estimates</label><vtb:table commandName="GLM" creator-version="28000000" subType="Estimated Marginal Means" tableId="-3886686550857089009" type="table"><vtb:tableStructure><vtb:dataPath>00000000081031_lightTableData.bin</vtb:dataPath></vtb:tableStructure></vtb:table></container><container text-align="left" visibility="visible"><label>Pairwise Comparisons</label><vtb:table commandName="GLM" creator-version="28000000" subType="EMMEANS Pairwise Comparisons" tableId="-3886686550857089008" type="table"><vtb:tableStructure><vtb:dataPath>00000000081032_lightTableData.bin</vtb:dataPath></vtb:tableStructure></vtb:table></container><container text-align="left" visibility="visible"><label>Multivariate Tests</label><vtb:table commandName="GLM" creator-version="28000000" subType="EMMEANS Multivariate Tests" tableId="-3886686550857089007" type="table"><vtb:tableStructure><vtb:dataPath>00000000081033_lightTableData.bin</vtb:dataPath></vtb:tableStructure></vtb:table></container></heading><heading commandName="GLM" locale="en-US" olang="en"><label>4. Condition - Group Assignment * Time</label><container text-align="left" visibility="visible" width="1651px"><label>Title</label><vtx:text commandName="GLM" creator-version="28000000" type="title"><html xmlns="http://www.w3.org/1999/xhtml" lang="en"><![CDATA[<head><style type="text/css">p{color:0;font-family:SansSerif;font-size:14pt;font-style:normal;font-weight:bold;text-decoration:none}</style></head><BR>4.&nbsp;Condition&nbsp;-&nbsp;Group&nbsp;Assignment&nbsp;*&nbsp;Time]]></html></vtx:text></container><container text-align="left" visibility="visible"><label>Estimates</label><vtb:table commandName="GLM" creator-version="28000000" subType="Estimated Marginal Means" tableId="-3886686550857089006" type="table"><vtb:tableStructure><vtb:dataPath>00000000081041_lightTableData.bin</vtb:dataPath></vtb:tableStructure></vtb:table></container><container text-align="left" visibility="visible"><label>Pairwise Comparisons</label><vtb:table commandName="GLM" creator-version="28000000" subType="EMMEANS Pairwise Comparisons" tableId="-3886686550857089005" type="table"><vtb:tableStructure><vtb:dataPath>00000000081042_lightTableData.bin</vtb:dataPath></vtb:tableStructure></vtb:table></container><container text-align="left" visibility="visible"><label>Univariate Tests</label><vtb:table commandName="GLM" creator-version="28000000" subType="EMMEANS Univariate Tests" tableId="-3886686550857089004" type="table"><vtb:tableStructure><vtb:dataPath>00000000081043_lightTableData.bin</vtb:dataPath></vtb:tableStructure></vtb:table></container></heading><heading commandName="GLM" locale="en-US" olang="en"><label>5. Condition - Group Assignment * Time</label><container text-align="left" visibility="visible" width="1651px"><label>Title</label><vtx:text commandName="GLM" creator-version="28000000" type="title"><html xmlns="http://www.w3.org/1999/xhtml" lang="en"><![CDATA[<head><style type="text/css">p{color:0;font-family:SansSerif;font-size:14pt;font-style:normal;font-weight:bold;text-decoration:none}</style></head><BR>5.&nbsp;Condition&nbsp;-&nbsp;Group&nbsp;Assignment&nbsp;*&nbsp;Time]]></html></vtx:text></container><container text-align="left" visibility="visible"><label>Estimates</label><vtb:table commandName="GLM" creator-version="28000000" subType="Estimated Marginal Means" tableId="-3886686550857089003" type="table"><vtb:tableStructure><vtb:dataPath>00000000081051_lightTableData.bin</vtb:dataPath></vtb:tableStructure></vtb:table></container><container text-align="left" visibility="visible"><label>Pairwise Comparisons</label><vtb:table commandName="GLM" creator-version="28000000" subType="EMMEANS Pairwise Comparisons" tableId="-3886686550857089002" type="table"><vtb:tableStructure><vtb:dataPath>00000000081052_lightTableData.bin</vtb:dataPath></vtb:tableStructure></vtb:table></container><container text-align="left" visibility="visible"><label>Multivariate Tests</label><vtb:table commandName="GLM" creator-version="28000000" subType="EMMEANS Multivariate Tests" tableId="-3886686550857089001" type="table"><vtb:tableStructure><vtb:dataPath>00000000081053_lightTableData.bin</vtb:dataPath></vtb:tableStructure></vtb:table></container></heading></heading><heading commandName="GLM" locale="en-US" olang="en"><label>Post Hoc Tests</label><container text-align="left" visibility="visible" width="1651px"><label>Title</label><vtx:text commandName="GLM" creator-version="28000000" type="title"><html xmlns="http://www.w3.org/1999/xhtml" lang="en"><![CDATA[<head><style type="text/css">p{color:0;font-family:SansSerif;font-size:14pt;font-style:normal;font-weight:bold;text-decoration:none}</style></head><BR>Post&nbsp;Hoc&nbsp;Tests]]></html></vtx:text></container><heading commandName="GLM" locale="en-US" olang="en"><label>Condition - Group Assignment</label><container text-align="left" visibility="visible" width="1651px"><label>Title</label><vtx:text commandName="GLM" creator-version="28000000" type="title"><html xmlns="http://www.w3.org/1999/xhtml" lang="en"><![CDATA[<head><style type="text/css">p{color:0;font-family:SansSerif;font-size:14pt;font-style:normal;font-weight:bold;text-decoration:none}</style></head><BR>Condition&nbsp;-&nbsp;Group&nbsp;Assignment]]></html></vtx:text></container><container text-align="left" visibility="visible"><label>Multiple Comparisons</label><vtb:table commandName="GLM" creator-version="28000000" subType="POSTHOC Multiple Comparisons" tableId="-3886686550857089000" type="table"><vtb:tableStructure><vtb:dataPath>00000000081111_lightTableData.bin</vtb:dataPath></vtb:tableStructure></vtb:table></container><heading commandName="GLM" locale="en-US" olang="en"><label>Homogeneous Subsets</label><container text-align="left" visibility="visible" width="1651px"><label>Title</label><vtx:text commandName="GLM" creator-version="28000000" type="title"><html xmlns="http://www.w3.org/1999/xhtml" lang="en"><![CDATA[<head><style type="text/css">p{color:0;font-family:SansSerif;font-size:14pt;font-style:normal;font-weight:bold;text-decoration:none}</style></head><BR>Homogeneous&nbsp;Subsets]]></html></vtx:text></container><container text-align="left" visibility="visible"><label>MEASURE_1</label><vtb:table commandName="GLM" creator-version="28000000" subType="Homogeneous Subsets" tableId="-3886686550857088999" type="table"><vtb:tableStructure><vtb:dataPath>000000000811121_lightTableData.bin</vtb:dataPath></vtb:tableStructure></vtb:table></container></heading></heading></heading></heading></heading>
